# Supplementary material
Source: publisher figshare collection journal article supplement (https://karger.figshare.com/ndownloader/files/16261391)
Supplement: Supplementary file 1 [file 16261391]

**Supplemental Figure 1.** Prognosis after introduction of TKI according to best therapeutic response with initial TKI treatment.

Influence of therapeutic efficacy of initial TKI treatment, following exclusion of patients without imaging findings (n=3). The prognosis of patients whose best therapeutic response to the initial TKI treatment was progressive disease (PD) (n=27) was worse as compared to the non-PD patients (n=54). (a) All patients. (b) PD vs. non-PD. Overall survival rate after 1, 2, and 3 years: 72.2% vs. 96.2%, 29.0% vs. 80.7%, 15.5% vs. 80.7%, respectively ( $P<0.001$ ).

Supplemental Figure 1

a.

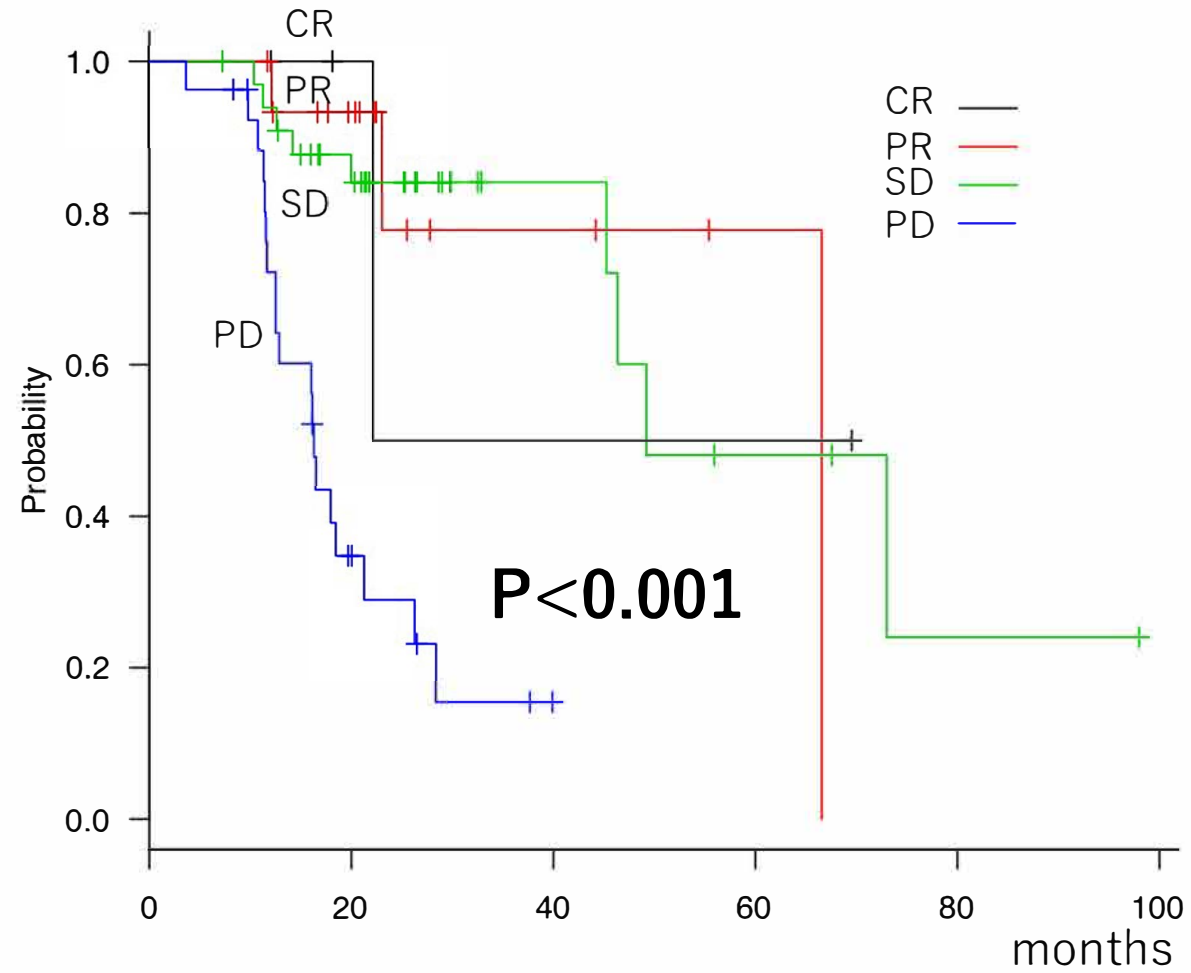

|    | Number at risk |    |   |   |   |   |  |
|----|----------------|----|---|---|---|---|--|
| CR | 4              | 2  | 1 | 1 | 0 | 0 |  |
| PR | 16             | 10 | 3 | 1 | 0 | 0 |  |
| SD | 34             | 24 | 7 | 3 | 1 | 0 |  |
| PD | 27             | 7  | 0 | 0 | 0 | 0 |  |

b.

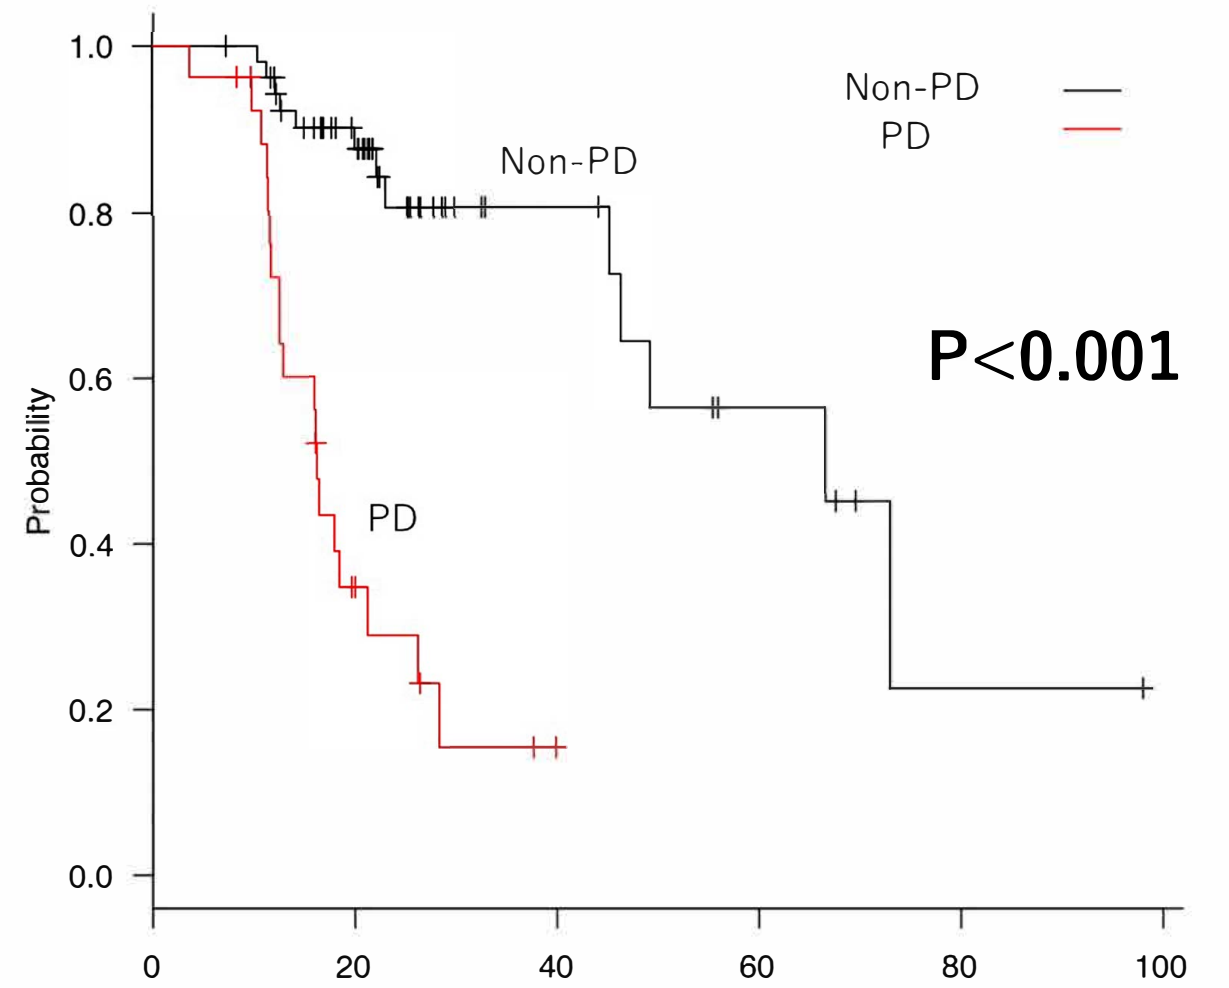

|        | Number at risk |    |    |   |   |   |  |
|--------|----------------|----|----|---|---|---|--|
| Non-PD | 54             | 36 | 11 | 5 | 1 | 0 |  |
| PD     | 27             | 7  | 0  | 0 | 0 | 0 |  |
